# Supplementary material
Source: Research Square preprint supplement (doi:10.21203/rs.3.rs-9156519/v1)
Supplement: Supplementary file 3 [file e6186540383dee0f37724a9f.pdf]

1 **Supplementary Table 1. Adjuvant chemotherapy regimens**

| Variables                |                     | RFS < 2 years<br>(n = 45) | RFS ≥ 2 years<br>(n = 55) | <i>p</i> |
|--------------------------|---------------------|---------------------------|---------------------------|----------|
| Adjuvant therapy regimen | S-1                 | 37                        | 49                        | 0.88     |
|                          | Gemcitabine         | 2                         | 3                         |          |
|                          | GnP                 | 1                         | 0                         |          |
|                          | Modified FOLFIRINOX | 0                         | 1                         |          |
|                          | None                | 5                         | 2                         |          |

2

3 GnP, gemcitabine plus nab-paclitaxel; FOLFIRINOX, fluorouracil, leucovorin, irinotecan, and oxaliplatin; RFS,  
4 recurrence-free survival

5

6 **Supplementary Table 2. Sites of initial recurrence**

| Site               | n (%)     |
|--------------------|-----------|
| Liver              | 16 (35.6) |
| Lymph nodes        | 8 (17.8)  |
| Lungs              | 7 (15.6)  |
| Peritoneum         | 7 (15.6)  |
| Locoregional areas | 5 (11.1)  |
| Bone               | 1 (2.2)   |
| Subcutaneous       | 1 (2.2)   |

7

8

9 **Supplementary Table 3. Cox proportion hazards model for RFS**

| Variable                   | HR   | 95% CI    | <i>p</i> |
|----------------------------|------|-----------|----------|
| Pre-NAC CA19-9             | 2.15 | 0.87–5.33 | 0.09     |
| Post-NAC tumor size        | 1.22 | 0.53–2.84 | 0.64     |
| Post-NAC CA19-9            | 0.85 | 0.35–2.08 | 0.72     |
| Pathological tumor size    | 2.73 | 1.16–6.44 | 0.02     |
| Positive lymph nodes (pN1) | 1.60 | 0.70–3.67 | 0.27     |

10

11 HR, hazard ratio; CI, confidence interval; NAC, neoadjuvant chemotherapy; CA19-9, carbohydrate antigen 19-9

12

13
