# Supplementary material
Source: Research Square preprint supplement (doi:10.21203/rs.3.rs-9156519/v1)

# Supplementary Fig. 2

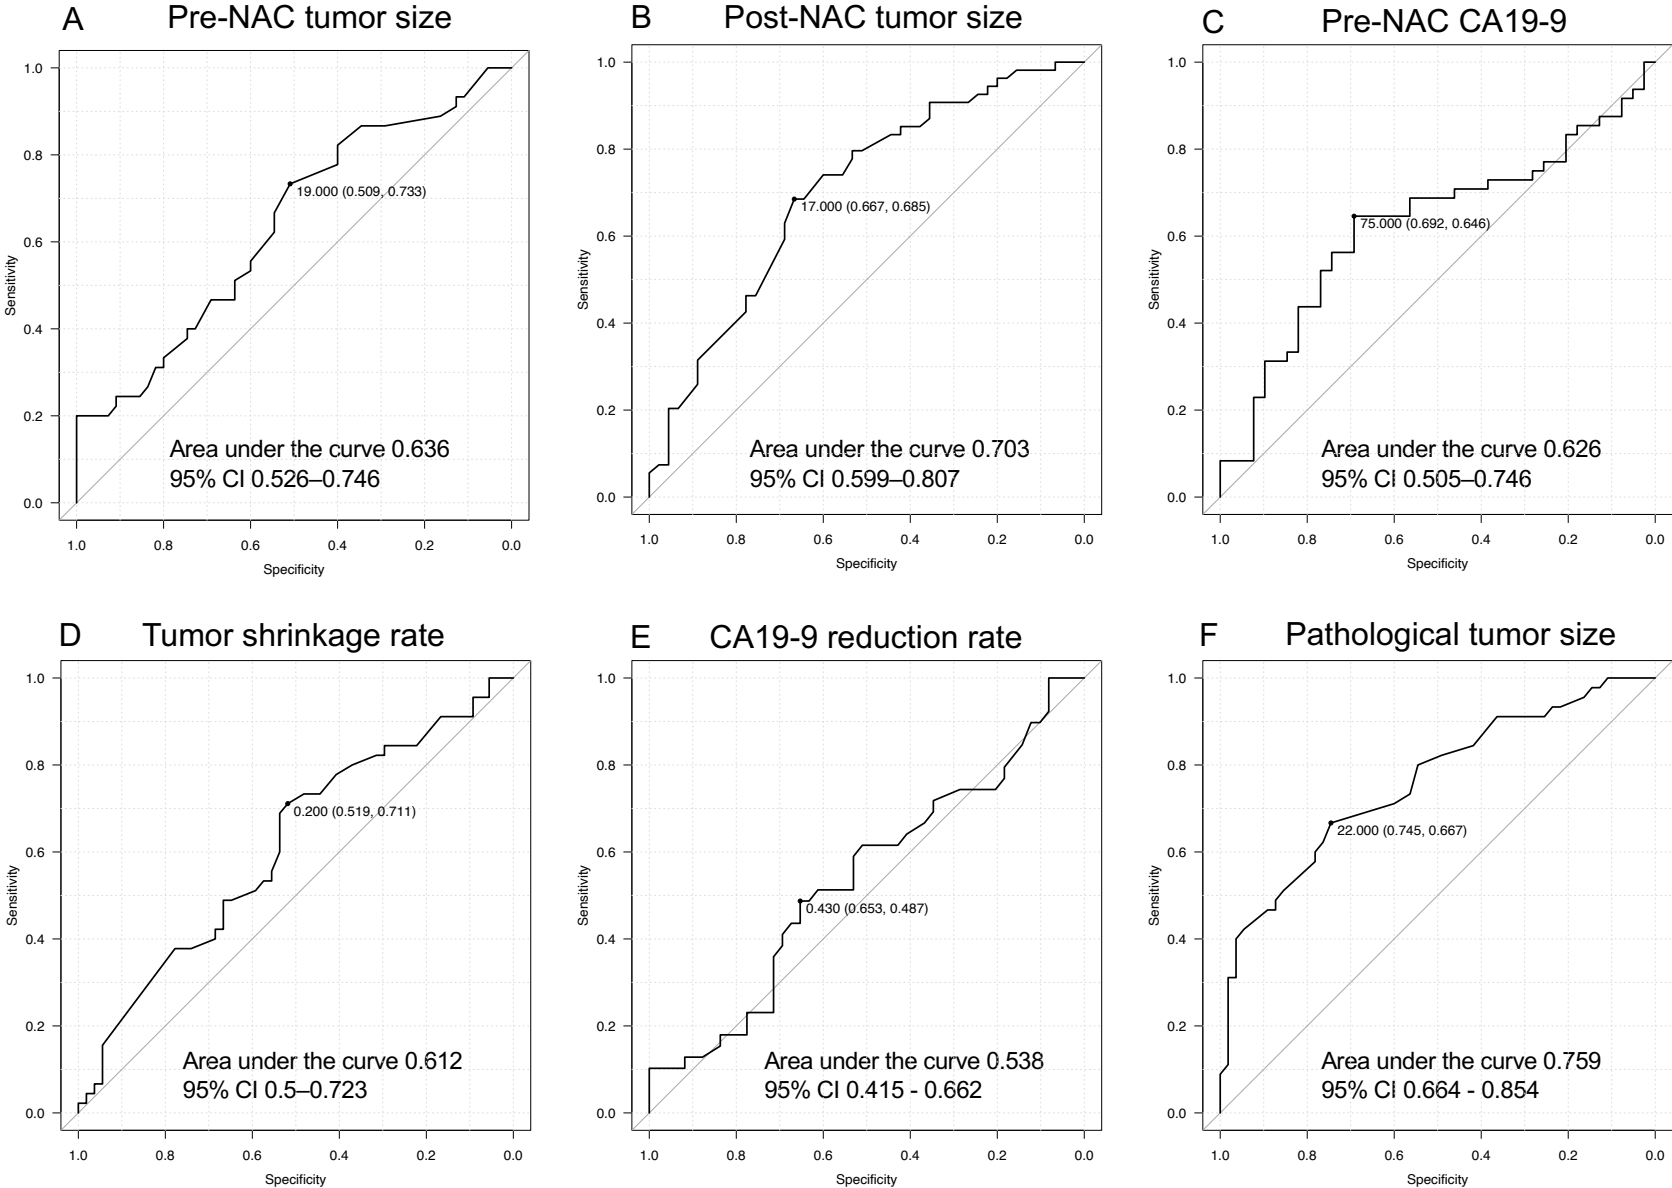

Supplement: Supplementary file 1 [file 463725e4935e9fd9b2aaab91.pdf]

# Supplementary Fig. 1

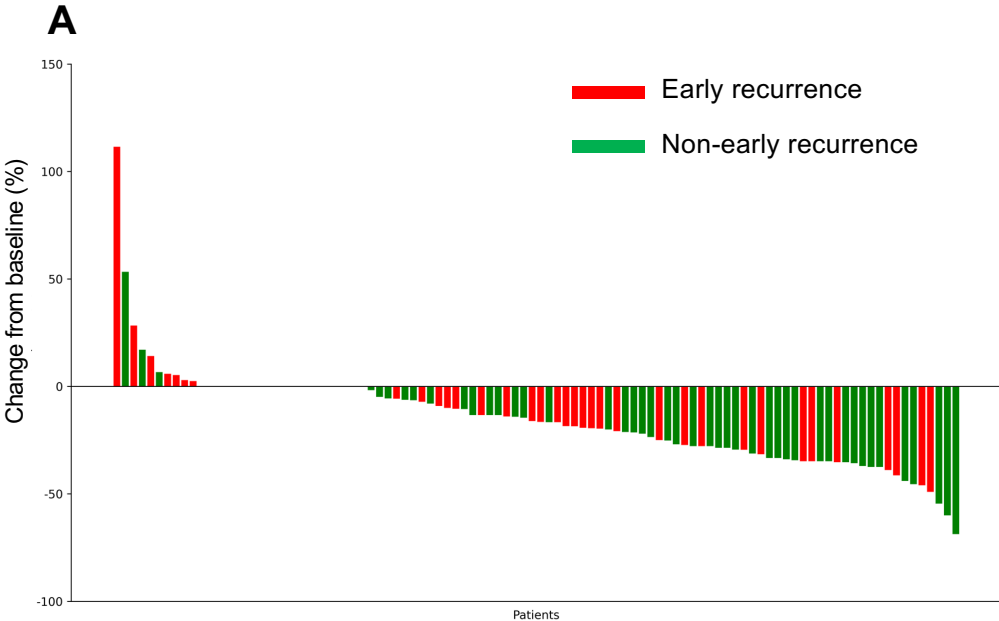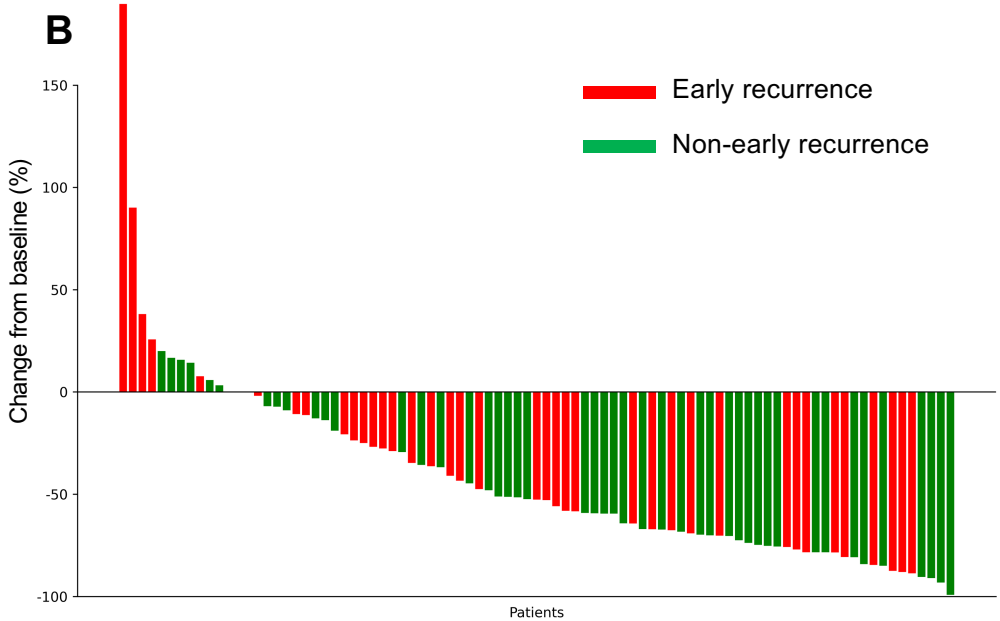

Supplement: Supplementary file 2 [file 9b47d0baac48fa20d9e28914.pdf]
